# Supplementary material for: The participation of insulin-like growth factor-binding protein 3 released by astrocytes in the pathology of Alzheimer’s disease
Source: PubMed Central journal article supplement (PMC4670528; doi:10.1186/s13041-015-0174-2), 2015-12-04
Supplement: 13041_2015_174_MOESM1_ESM.pdf [file 13041_2015_174_MOESM1_ESM.pdf]

Figure S

p-tau  
(AT180)

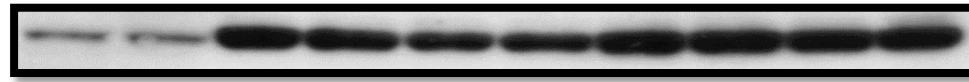

$\beta$  actin

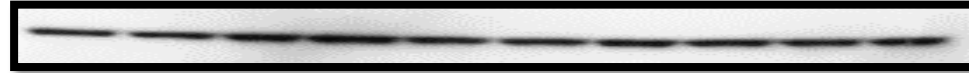

|                       |   |   |   |   |   |
|-----------------------|---|---|---|---|---|
| A $\beta$ (1 $\mu$ M) | - | + | + | + | + |
| IGF-1 (100ng/ml)      | - | - | + | + | - |
| IGFBP-3 (100ng/ml)    | - | - | - | + | + |

|   |   |   |   |   |
|---|---|---|---|---|
| - | + | + | + | + |
| - | - | + | + | - |
| - | - | - | + | + |

A

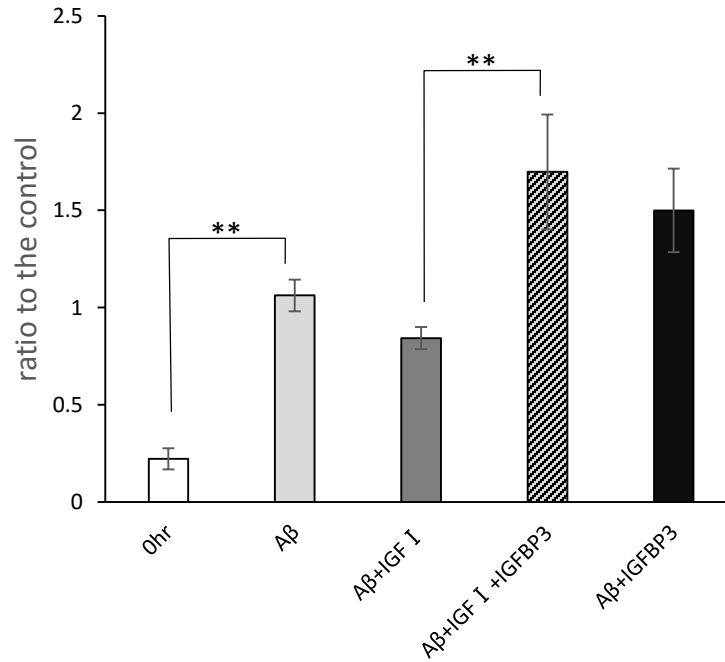

B phosphorylation of tau (AT180)
